# Supplementary material
Source: PubMed Central journal article supplement (PMC2929438)
Supplement: NIHMS29804-supplement-2.pdf [file NIHMS29804-supplement-2.pdf]

# ***In vivo* Prevention of Transplant Arteriosclerosis by *ex vivo* Expanded Human Regulatory T Cells**

Satish N. Nadig<sup>1\*</sup>, Joanna Więckiewicz<sup>1\*</sup>, Douglas C. Wu<sup>1</sup>, Gregor Warnecke<sup>1</sup>, Wei Zhang<sup>1</sup>, Shiqiao Luo<sup>1</sup>, Alexandru Schiopu<sup>1</sup>, David P. Taggart<sup>2</sup>, and Kathryn J. Wood<sup>1</sup>

*<sup>1</sup> Transplantation Research Immunology Group, Nuffield Department of Surgery, John Radcliffe Hospital, University of Oxford, Oxford OX3 9DU, United Kingdom*

*<sup>2</sup> Nuffield Department of Surgery, John Radcliffe Hospital Division of Cardiothoracic Surgery, United Kingdom*

\*SNN and JW contributed equally to this text

**Correspondence author:** Kathryn J. Wood

Transplantation Research Immunology Group,  
Nuffield Department of Surgery,  
John Radcliffe Hospital,  
University of Oxford,  
Oxford OX3 9DU,  
United Kingdom  
E-mail: Kathryn.Wood@nds.ox.ac.uk

# Supplementary Figure 1

a

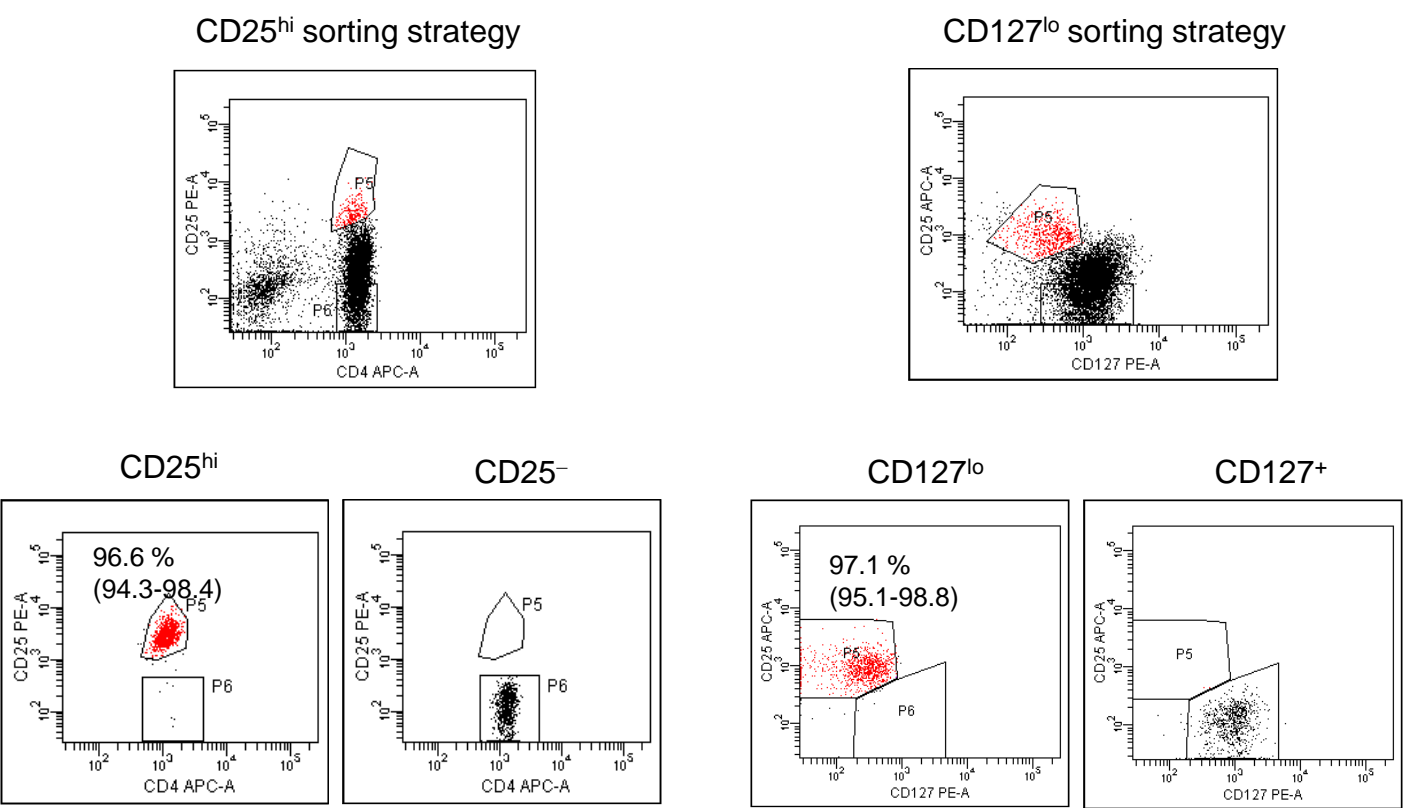

b

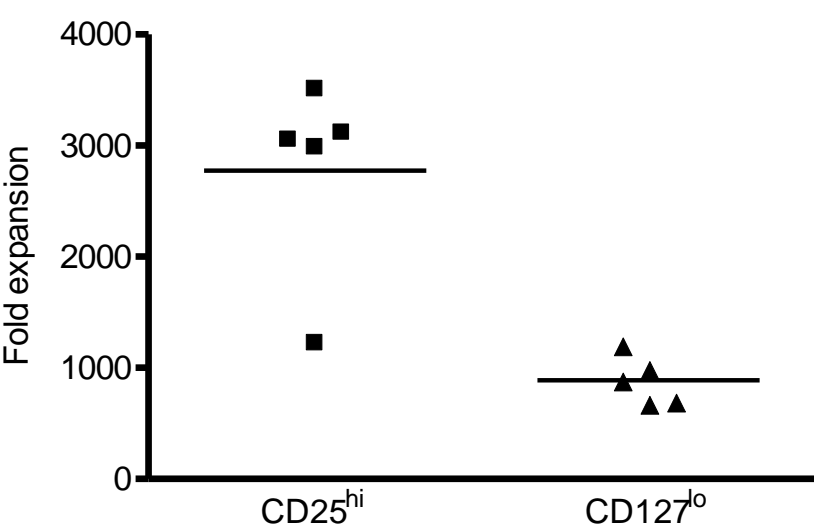

Supplementary Figure 1: see next page for figure legend

Supplementary Figure 1

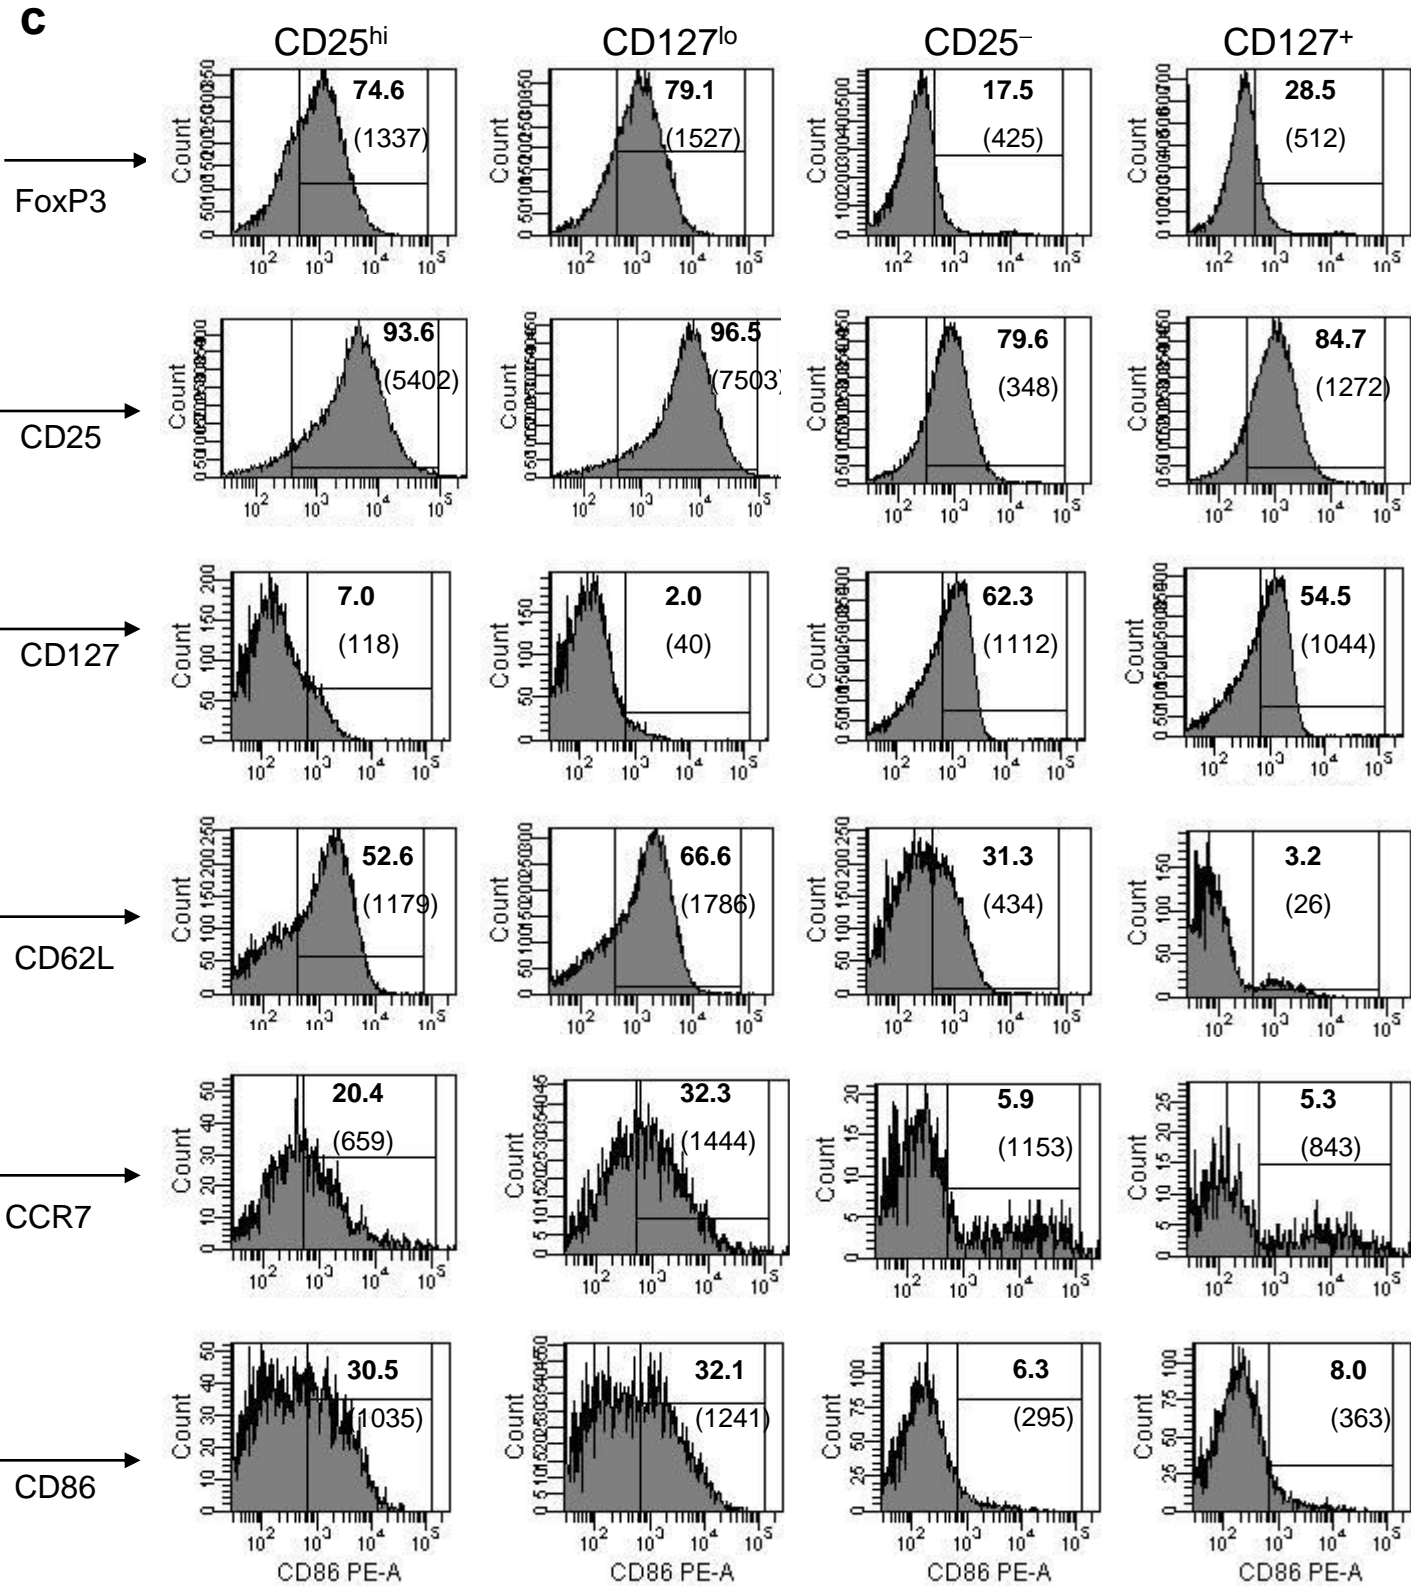

**Supplementary Figure 1: T<sub>reg</sub> cells sorting strategy and ex vivo expansion.**

(a) Cells stained with CD4 APC and CD25 PE were isolated as CD25<sup>hi</sup>CD4<sup>+</sup> along with CD25<sup>-</sup>CD4<sup>+</sup> by high speed cell sorting. Additionally, cells stained with CD127 PE, CD25 APC and CD4 PerCP were sorted as CD127<sup>lo</sup>CD25<sup>+</sup>CD4<sup>+</sup> and CD127<sup>+</sup>CD25<sup>-</sup>CD4<sup>+</sup>. Mean purity and range of each sorted population and range of purity achieved using PBMC from five individual blood donors are shown. (b) Fold expansion data at the end of the expansion protocol (d16) are shown for CD25<sup>hi</sup> and CD127<sup>lo</sup> T<sub>reg</sub> cells. (c) Sorted and ex vivo expanded CD25<sup>hi</sup> and CD127<sup>lo</sup> T<sub>reg</sub> cells, as well as CD25<sup>-</sup> and CD127<sup>+</sup> effector T cells, were stained for surface and intracellular antigens. A representative example of expanded cells from the same PBMC donor is shown. Percentage of positive cells is shown in bold whilst mean fluorescence intensity (MFI) is shown in brackets.

Supplementary Figure 2

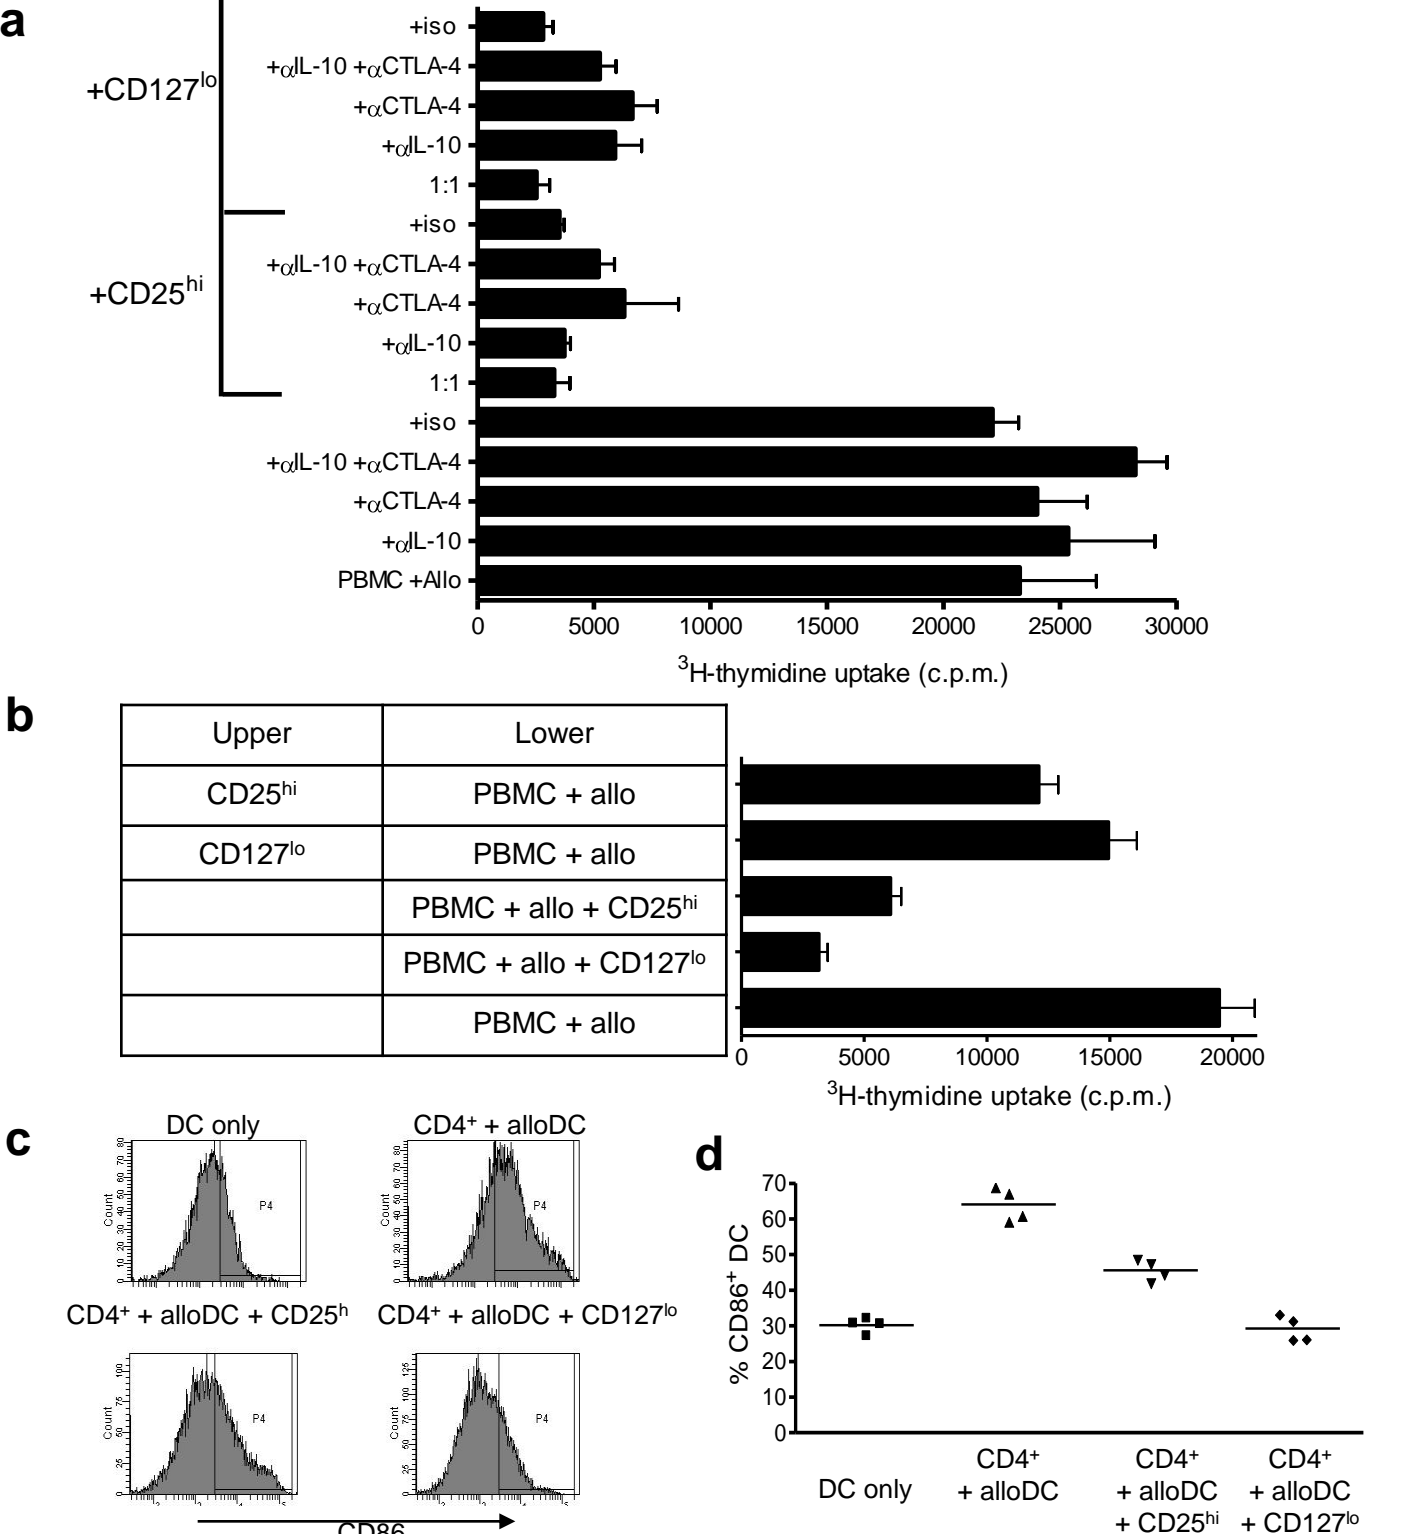

Supplementary Figure 2: Suppressive effect of expanded T regulatory cells *in vitro*.

(a) PBMC were co-cultured with irradiated allogeneic PBMC and expanded T<sub>reg</sub> cells for 7 days at a 1:1 ratio in the presence or absence of either antibody to IL-10 (1μg ml<sup>-1</sup>), antibody to CTLA-4 (1μg ml<sup>-1</sup>), the combination or isotype control antibody. <sup>3</sup>H-thymidine incorporation was measured to assess proliferation. Each test consisted of 3–6 replicates. (b) Expanded T<sub>reg</sub> cells were cultured in 1:1:1 ratio with autologous PBMC (PBMC) and irradiated allogeneic PBMC (allo) in either upper or lower Transwell chamber as indicated. Proliferation was assessed by <sup>3</sup>H-thymidine incorporation after 7 days of culture. Each test consisted of 4 replicates. (c,d) CD14 microbead-enriched monocytes were cultured *in vitro* in the presence of recombinant human IL-4 and GM-SCF. The resultant monocyte-derived DC were cultured in quadruplicates with allogeneic CD25<sup>-</sup>CD4<sup>+</sup> cells and corresponding expanded T<sub>reg</sub> cells in 1:1:1 ratio for further 3 days. CD86 expression on DC was analysed by flow cytometry. Histograms of CD86 expression (c) and percentage of CD86<sup>+</sup> DC (d) are presented.

# Supplementary Figure 3

a

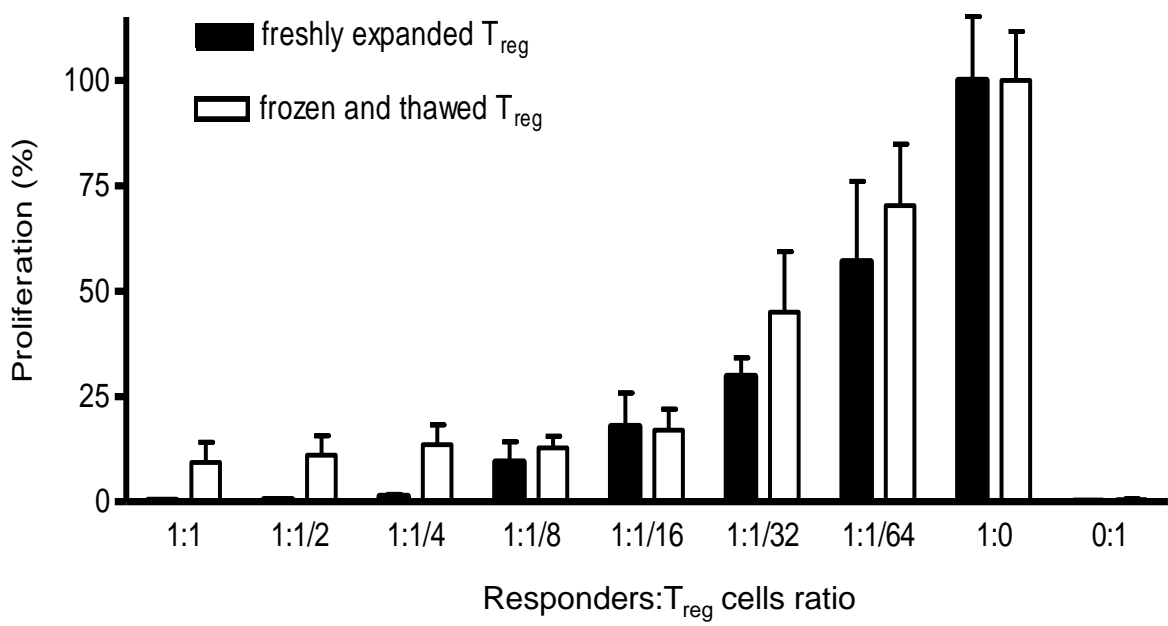

b

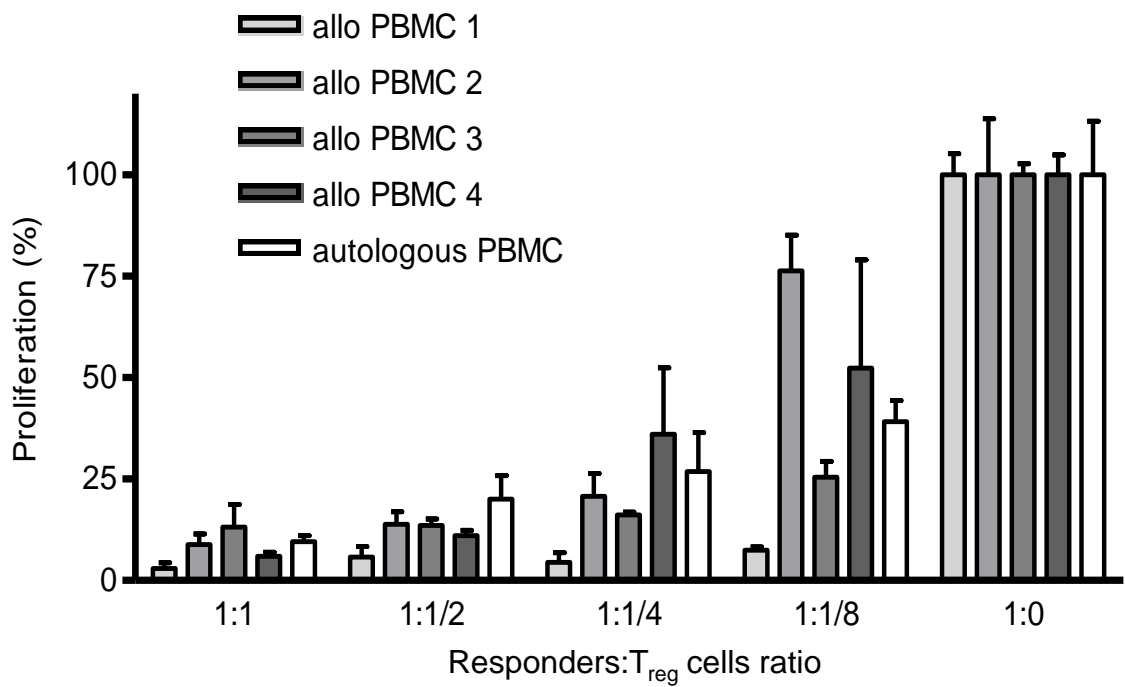

**Supplementary Figure 3: Analysis of specificity and the effect of freezing and thawing on expanded T<sub>reg</sub> cells function *in vitro*.**

(a) Thawed *ex-vivo* expanded T<sub>reg</sub> cells show similar *in vitro* suppression capacity as expanded cells analyzed before freezing. PBMC were co-cultured with irradiated allogeneic PBMC and serial dilutions of expanded Treg cells for 7 days. <sup>3</sup>H-thymidine incorporation was measured to assess cellular proliferation. Data shown represent percentage of proliferation compared to stimulated PBMC control. Each test consisted of 4 replicates. (b) Autologous PBMC or non-matched allogeneic PBMC were co-cultured with irradiated allogeneic PBMC and serial dilutions of expanded T<sub>reg</sub> cells for 7 days. <sup>3</sup>H-thymidine incorporation was measured to assess cellular proliferation. Data shown represent percentage proliferation compared to that of the stimulated PBMC control. Each test consisted of 4 replicates. The data shown are representative of two independent experiments.

Supplementary Figure 4

a

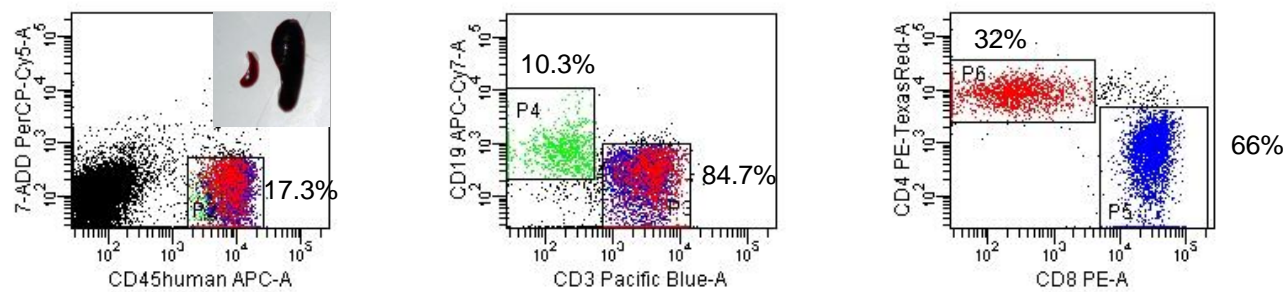

b

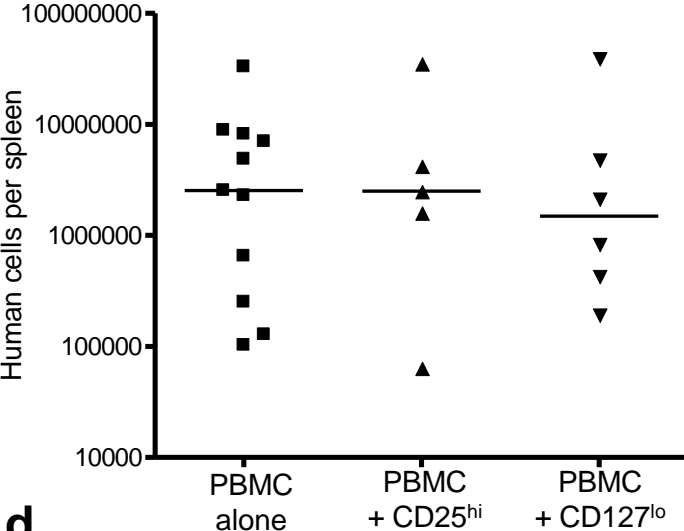

c

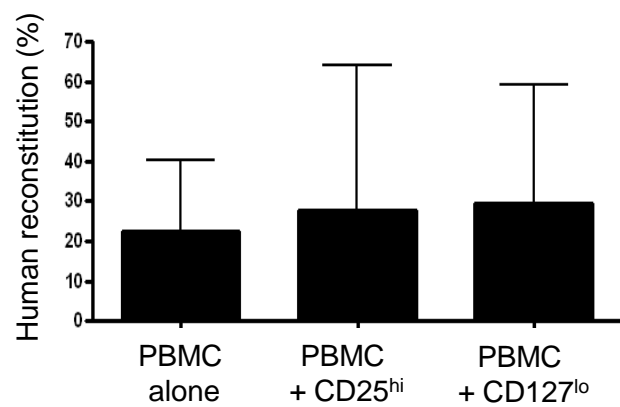

d

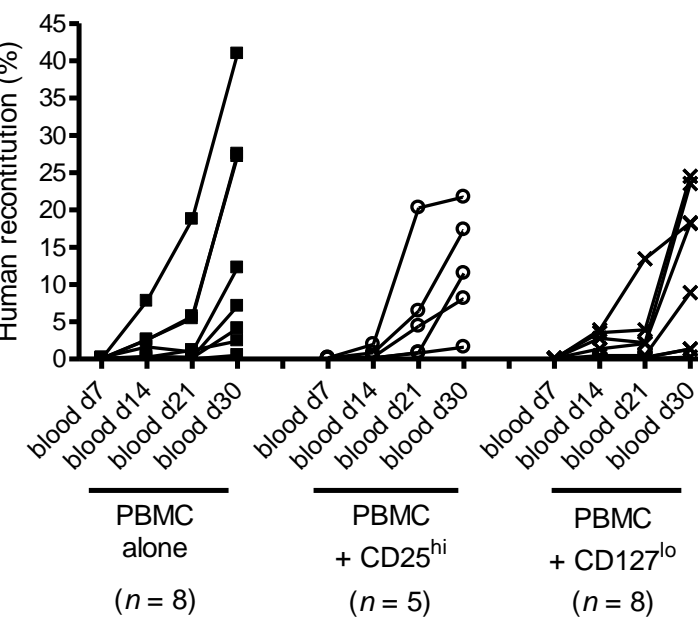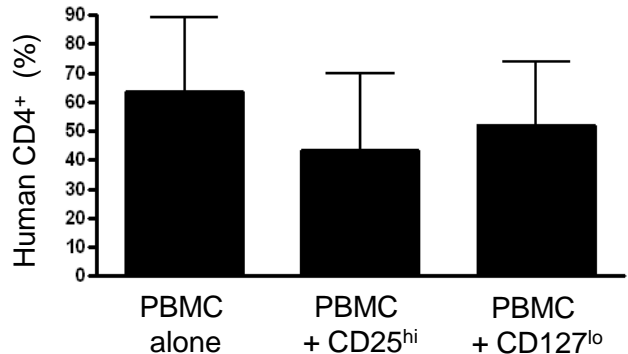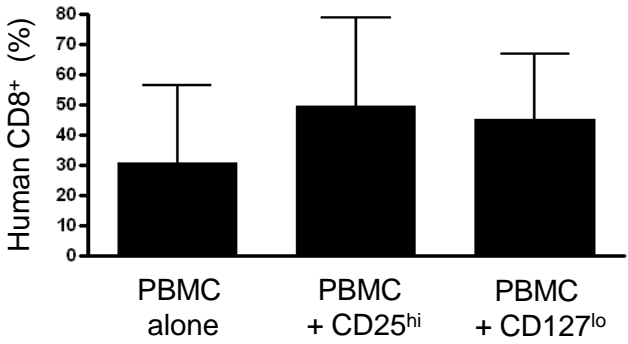

Supplementary Figure 4: Human cell reconstitution of immunodeficient mouse.

(a) Representative plots of human PBMC-engrafted mouse splenocytes are shown. In mice reconstituted with  $10^7$  human PBMC, human cell subsets were gated on live human CD45<sup>+</sup> cells isolated from spleens of inoculated mice 30 days after human cell transfer. Engrafted spleens showed splenomegaly and marked hepatization (a insert). (b) Number of human cells (CD45<sup>+</sup>) in a spleen of reconstituted mice on day 30. (c) The percentage of human CD45<sup>+</sup>, CD4<sup>+</sup>, or CD8<sup>+</sup> reconstitution in the spleen as detected by FACS analysis. (d) Kinetics of repopulation with human leukocytes was measured in the blood on day 7, 14, 21 and 30 after adoptive transfer of human PBMC. Each line represents one mice, the percentage of human CD45<sup>+</sup> cells within live leukocyte gate is shown. (a–c) Samples from mice transplanted with human artery and inoculated with human PBMC, (d) samples from untransplanted mice inoculated with human PBMC.

# Supplementary Figure 5

a

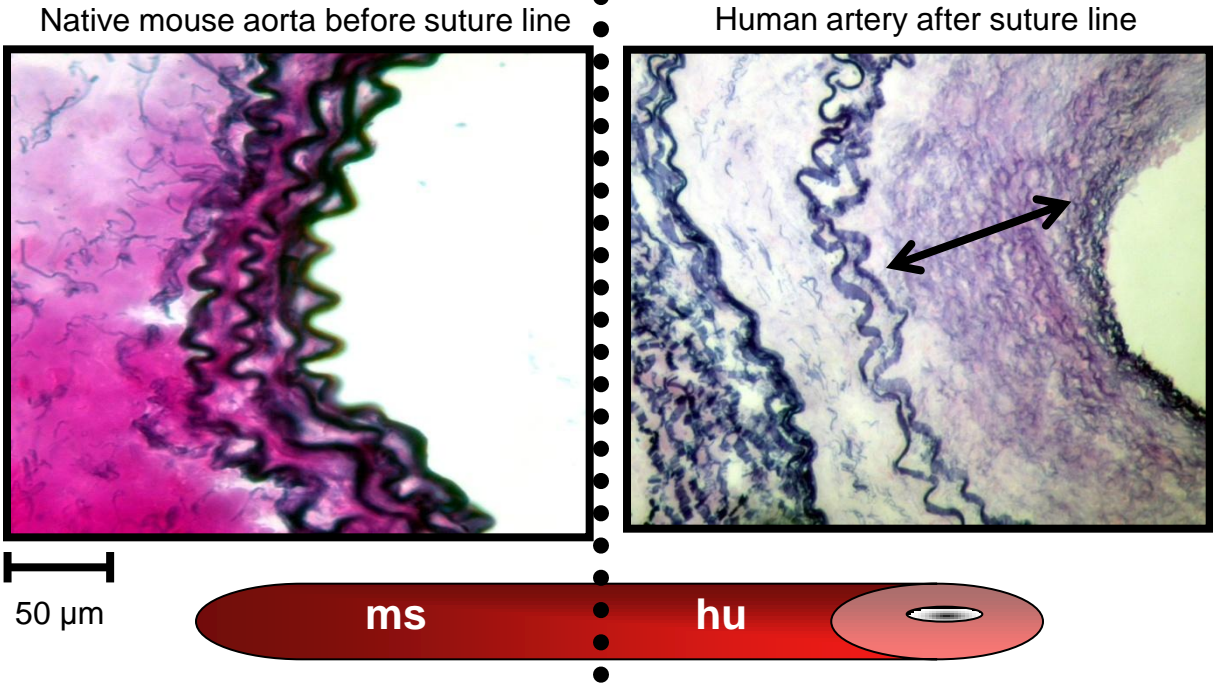

b

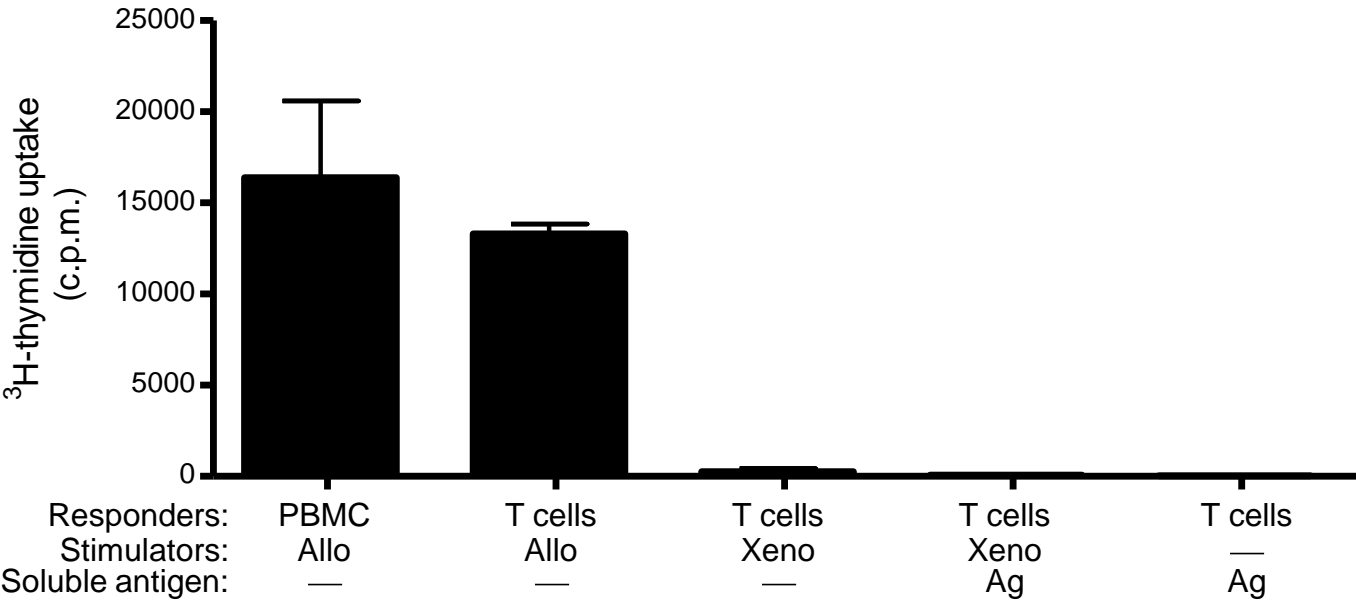

**Supplementary Figure 5: Human allo-responses predominate over xeno-responses both *in vitro* and *in vivo*.**

(a) Representative EvG staining ( $n = 6$ ) shows no TA in the native mouse aorta when compared to marked intimal proliferation (arrow) just after the suture line in the human arterial segment. (b) PBMC or purified human T cells were cultured with irradiated allogeneic PBMC (allo) or BALB/c *Rag2*<sup>-/-</sup>*Il2rg*<sup>-/-</sup> splenocytes (xeno; direct pathway) or BALB/c *Rag2*<sup>-/-</sup>*Il2rg*<sup>-/-</sup> splenocytes presenting sonicated human antigen (xeno + Ag; indirect pathway).  $^3\text{H}$ -thymidine incorporation was measured. Error bars represented as standard deviations. *In vitro* results shown are representative of three independent experiments. ms = mouse; hu = human

# Supplementary Figure 6

**a**

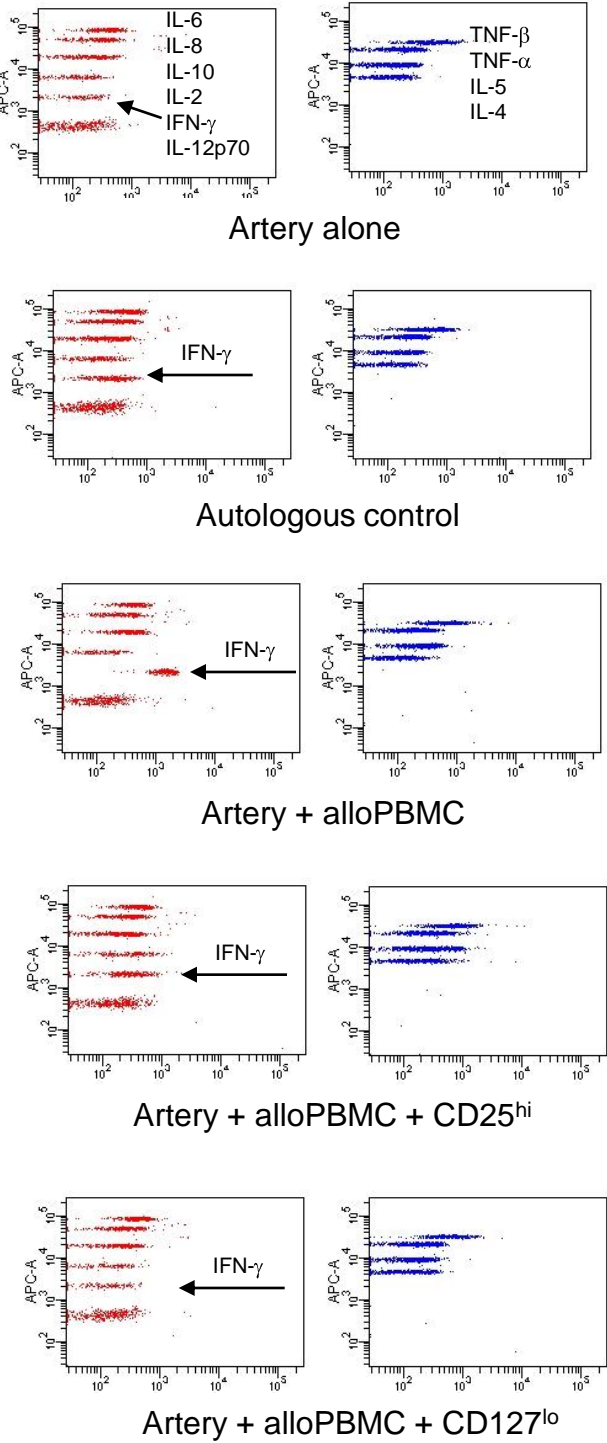

**b**

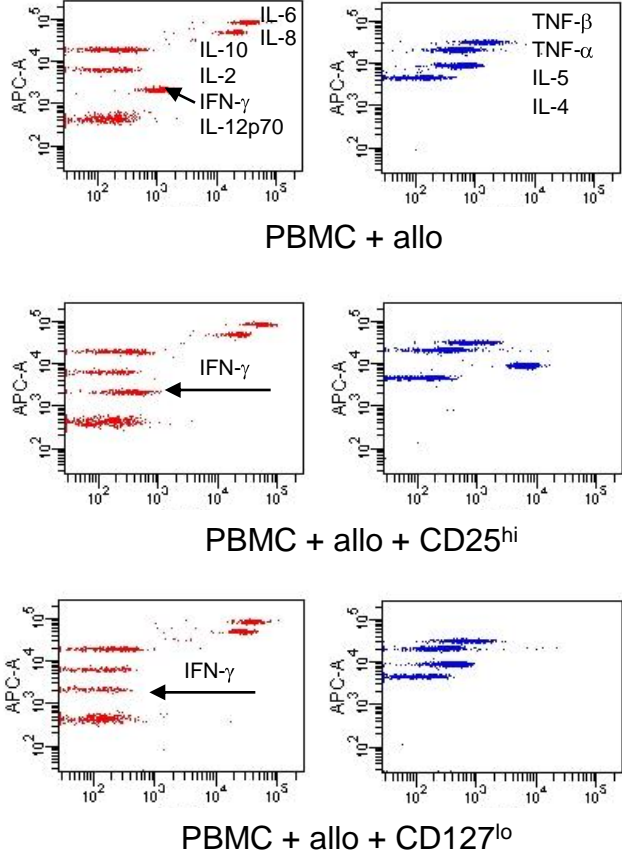

**Supplementary Figure 6: Analysis of *in vivo* and *in vitro* cytokine release in the presence of T regulatory cells.**

**(a)** Cytokine bead array was performed on serum samples harvested from mice transplanted with an arterial graft and reconstituted with allogeneic PBMC in the presence or absence of *ex vivo* expanded CD25<sup>hi</sup> or CD127<sup>lo</sup> T<sub>reg</sub> cells. **(b)** Cytokine bead array performed on supernatants taken after 5 days of culture of PBMC stimulated with irradiated allogeneic PBMC in the presence or absence of T<sub>reg</sub> cells. Representative dot plots from at least 3 independent experiments are shown.

# Supplementary Figure 7

a

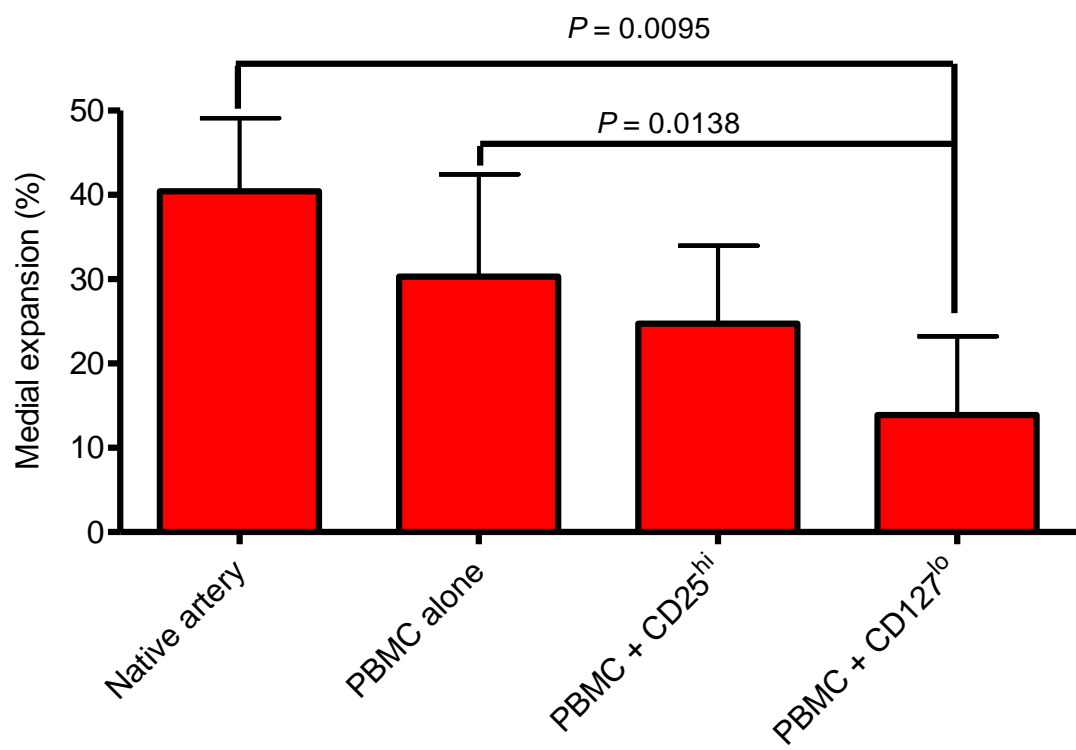

b

Native artery

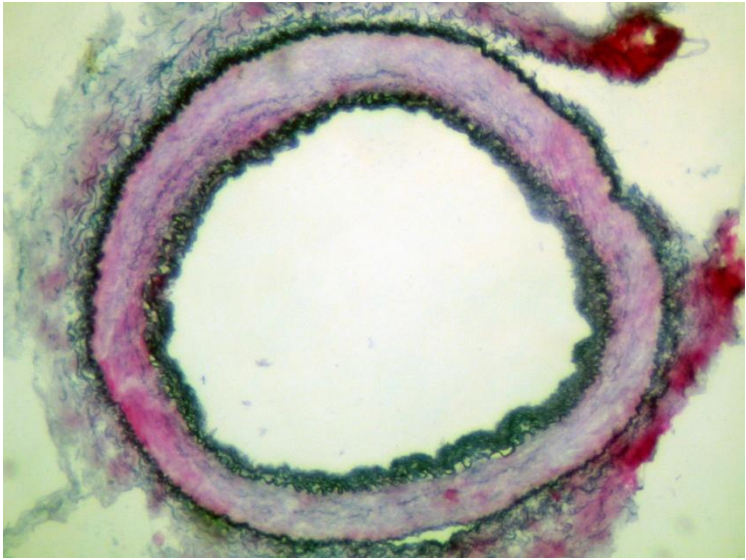

**Supplementary Figure 7: Changes in medial area of transplanted human arteries.**

(a) Medial area of untransplanted (native) human arteries and grafts procured 30 days after transplantation ( $n \geq 5$  in all groups). (b) A representative photomicrograph of a native untransplanted human artery is shown.

Supplementary Table 1: HLA typing

| Experimental Groups | PBMC Donor                                 | IMA Sidebranch Donor                    |
|---------------------|--------------------------------------------|-----------------------------------------|
| 1                   | A : 3, 24<br>B: 7,38<br>DR*: 13,15         | A: 1, 2<br>B: 8, 44<br>DR: 17,11        |
| 2                   | A:11, 2<br>B: <b>60</b> , 27<br>DR*: 8, 10 | A: 32, 3<br>B: <b>60</b><br>DR: 4       |
| 3                   | A:29, 26<br>B:44, 55<br>DR*: 7, 11         | A: 24, 25<br>B: 27, 18<br>DR*: 16, 15   |
| 4                   | A:1, <b>2</b><br>B:39, 60<br>DR*: 13, 8    | A: <b>2</b> , 31<br>B: 27, 51<br>DR*: 4 |
| 5                   | A:32, 3<br>B: 18, 56<br>DR*: 1, 11         | A: 11, 26<br>B: 44, 35<br>DR*: 103, 14  |

\*HLA – DR molecular type analysed from locus DRB1  
IMA= Internal Mammary Artery
